# Supplementary material for: Synthesis and catalytic activity of mesostructured KF/CaxAl2O(x+3) for the transesterification reaction to produce biodiesel
Source: Royal Society of Chemistry journal article supplement (doi:10.1039/c2ra22218c), 2012-01-01
Supplement: c2ra22218c.pdf [file c2ra22218c.pdf]

Supporting Information

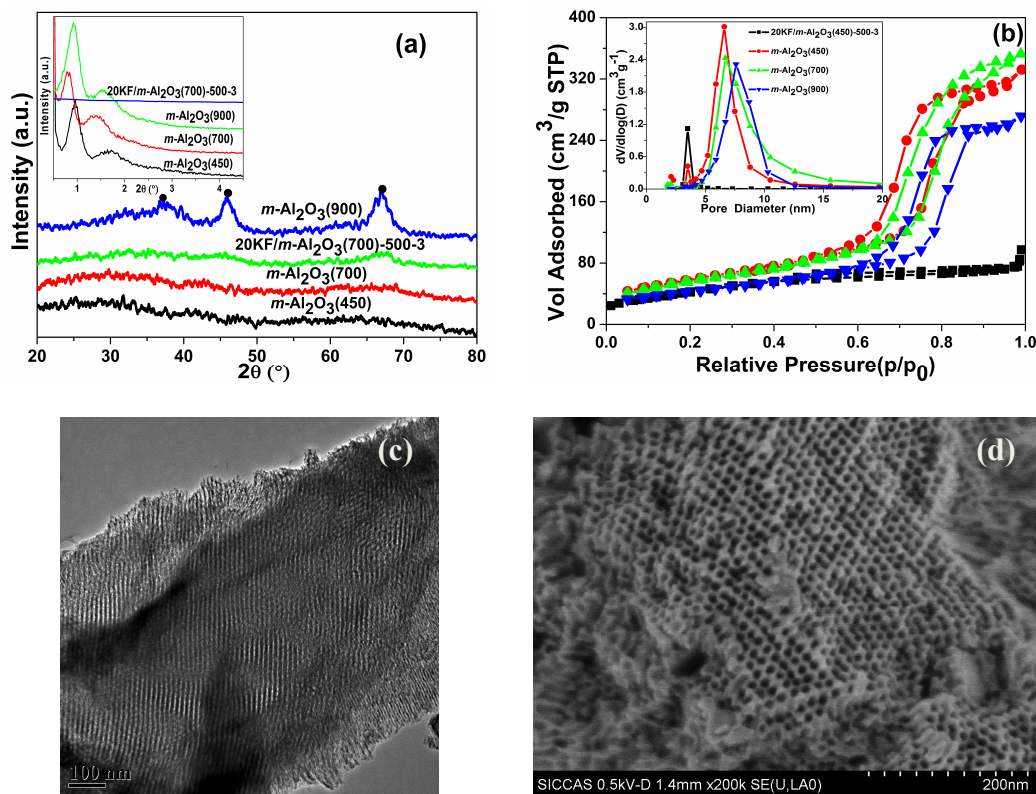

Fig. S1 Wide angle XRD patterns and the corresponding small angle XRD patterns (inset) (a), N<sub>2</sub> adsorption–desorption isotherms and the corresponding pore-size distributions (inset) (b) of 20KF/*m*-Al<sub>2</sub>O<sub>3</sub>(700)-500-3 and *m*-Al<sub>2</sub>O<sub>3</sub>(a) (a: the calcination temperatures (□)); (c) TEM and (d) SEM images of *m*-Al<sub>2</sub>O<sub>3</sub>(700); (●) Al<sub>2</sub>O<sub>3</sub>

Table S1 Texture properties of materials

| Materials                                                               | S <sub>BET</sub> (m <sup>2</sup> g <sup>-1</sup> ) | V <sub>BJH</sub> (cm <sup>3</sup> g <sup>-1</sup> ) | D <sub>BJH</sub> (nm) |
|-------------------------------------------------------------------------|----------------------------------------------------|-----------------------------------------------------|-----------------------|
| <i>m</i> -Al <sub>2</sub> O <sub>3</sub> (450) <sup>a</sup>             | 212                                                | 0.52                                                | 6.59                  |
| <i>m</i> -Al <sub>2</sub> O <sub>3</sub> (700) <sup>a</sup>             | 209                                                | 0.55                                                | 6.66                  |
| <i>m</i> -Al <sub>2</sub> O <sub>3</sub> (900) <sup>a</sup>             | 152                                                | 0.42                                                | 7.58                  |
| 20KF/ <i>m</i> -Al <sub>2</sub> O <sub>3</sub> (700)-500-3 <sup>a</sup> | 158                                                | 0.17                                                | 3.45                  |
| CaO                                                                     | 1.77                                               | 0.025                                               | -                     |

<sup>a</sup>*m*-Al<sub>2</sub>O<sub>3</sub>(a) and 20KF/*m*-Al<sub>2</sub>O<sub>3</sub>(700)-500-3 were prepared by the similar method to *m*-CaAl<sub>2</sub>O<sub>4</sub>(a) and zKF/*m*-CaAl<sub>2</sub>O<sub>4</sub>(700)-b-c, respectively, accompanied with the following changes: higher amount of Al species (20 mmol) and without calcium nitrate tetrahydrate.

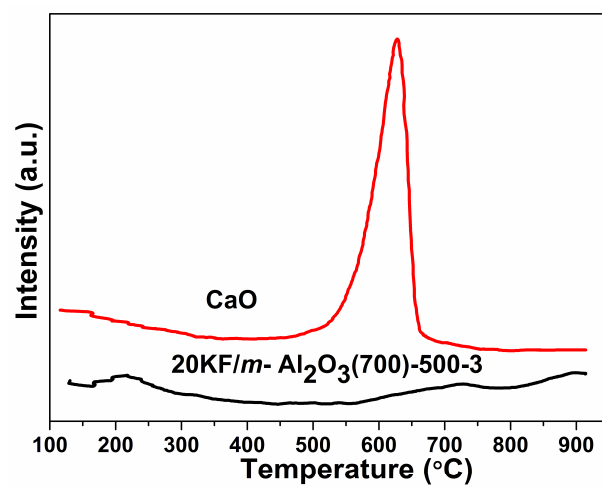

Fig. S2 CO<sub>2</sub>-TPD profiles of CaO and 20KF/*m*-Al<sub>2</sub>O<sub>3</sub>(700)-500-3

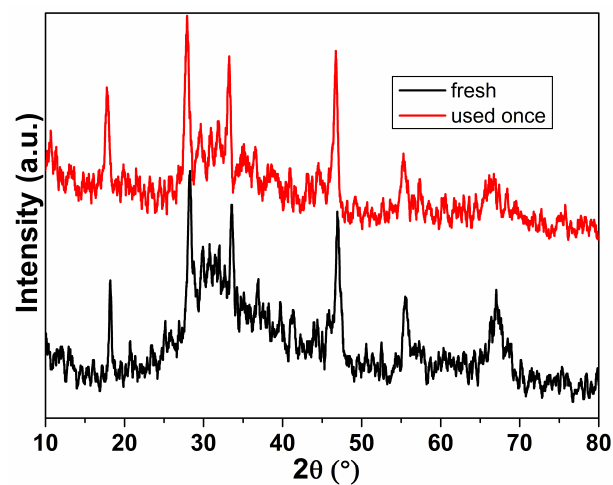

Fig. S3 Wide angle XRD patterns of the fresh and reused catalyst (30KF/*m*-CaAl<sub>4</sub>(700)-700-3)
